# Supplementary material for: Tissue classification by rapid evaporative ionization mass spectrometry (REIMS): comparison between a diathermic knife and CO2 laser sampling on classification performance
Source: PubMed Central journal article supplement (PMC6920236; doi:10.1007/s00216-019-02148-8), 2019-11-11
Supplement: 216_2019_2148_MOESM1_ESM.pdf [file 216_2019_2148_MOESM1_ESM.pdf]

## **Analytical and Bioanalytical Chemistry**

### **Electronic Supplementary Material**

#### **Tissue classification by rapid evaporative ionization mass spectrometry (REIMS): comparison between a diathermic knife and CO<sub>2</sub> laser sampling on classification performance**

Michele Genangeli, Ron M.A. Heeren, Tiffany Porta Siegel

## Table of content

|                                                                                                                                                                                                                                                                                                                                                                                                                                                        |    |
|--------------------------------------------------------------------------------------------------------------------------------------------------------------------------------------------------------------------------------------------------------------------------------------------------------------------------------------------------------------------------------------------------------------------------------------------------------|----|
| <b>Figure S1</b> – Home built laser arm used to maintain the laser in a fixed and safe position during analysis [a]. Control box for the safety arm includes height control to ensure that the laser is at optimal focus position on the tissue analyzed[b].                                                                                                                                                                                           | 3  |
| <b>Figure S2</b> – Laser-REIMS spectra obtained from sampling chicken liver with different modalities. CW = continuous wave, Pulsed and super pulse modalities).                                                                                                                                                                                                                                                                                       | 4  |
| <b>Figure S3</b> –Mass spectra obtained from a cow liver sampled using the MALDI-Orbitrap and zoom in the region between m/z 1200-1400. No clusters are visible in the higher mass range.                                                                                                                                                                                                                                                              | 5  |
| <b>Figure S4</b> – REIMS-LDA-3D score plot including all data acquired from sampling soft tissue types. L=laser. k=diathermic knife.                                                                                                                                                                                                                                                                                                                   | 6  |
| <b>Figure S5</b> - Laser REIMS-LDA-3D score plot including data acquired from sampling soft tissue types but excluding the data related to duck skin. L=laser. k=diathermic knife.                                                                                                                                                                                                                                                                     | 6  |
| <b>Figure S6</b> - Laser REIMS-LDA-3D score plot including data acquired from sampling soft tissue types but excluding the data related to duck skin and duck liver. L=laser. k=diathermic knife                                                                                                                                                                                                                                                       | 7  |
| <b>Figure S7</b> - Visualization of bone damage induced by laser sampling using different modalities available with the CO2 laser system. CW = continuous wave                                                                                                                                                                                                                                                                                         | 8  |
| <b>Table S1</b> - Lipid identification from REIMS and MALDI-MS measurements of cow liver tissues. CE= collision energy (eV), Measured REIMS = measured m/z with REIMS-TOF system, Orbitrap = measured m/z with Orbitrap system, Theor.Mass = Theoretical mass (m/z), ppm err = calculated error in part-per-million (for REIMS, Orbitrap), Prod ion = Product ion (m/z, for REIMS), Fragments id = fragments identification, Id = Lipid identification | 9  |
| <b>Table S2 - Lipid identification from chicken liver measurements.</b> CE= collision energy (eV), Measured REIMS = measured m/z with REIMS-TOF system, Orbitrap = measured m/z with Orbitrap system, Theor.Mass = Theoretical mass (m/z), Ppm err = calculated error in part-per-million (for REIMS, Orbitrap), Prod ion = Product ion (m/z, for REIMS), Fragments id = fragments identification, Id = Lipid identification                           | 10 |
| <b>Table S3 - Lipid identification from cow muscle measurements.</b> CE= collision energy (eV), Measured REIMS = measured m/z with REIMS-TOF system, Orbitrap = measured m/z with Orbitrap system, Theor.Mass = Theoretical mass (m/z), Ppm err = calculated error in part-per-million (for REIMS, Orbitrap), Prod ion = Product ion (m/z, for REIMS), Fragments id = fragments identification, Id = Lipid identification                              | 11 |
| <b>Table S4 - Lipid identification from chicken muscle measurements.</b> CE= collision energy (eV), Measured REIMS = measured m/z with REIMS-TOF system, Orbitrap = measured m/z with Orbitrap system, Theor.Mass = Theoretical mass (m/z), Ppm err = calculated error in part-per-million (for REIMS, Orbitrap), Prod ion = Product ion (m/z, for REIMS), Fragments id = fragments identification, Id = Lipid identification                          | 12 |
| <b>Table S5</b> – Results from the spectra comparison between the laser and diathermic knife.                                                                                                                                                                                                                                                                                                                                                          | 13 |
| <b>Table S6</b> - Peak lists reporting m/z values used to create the different peak list-based models. The m/z values are reported in order of importance for the discrimination of each tissue with the most important values on top. For the “All” model, a combination of peak lists was used accordingly to the tissues included in the model.                                                                                                     | 14 |

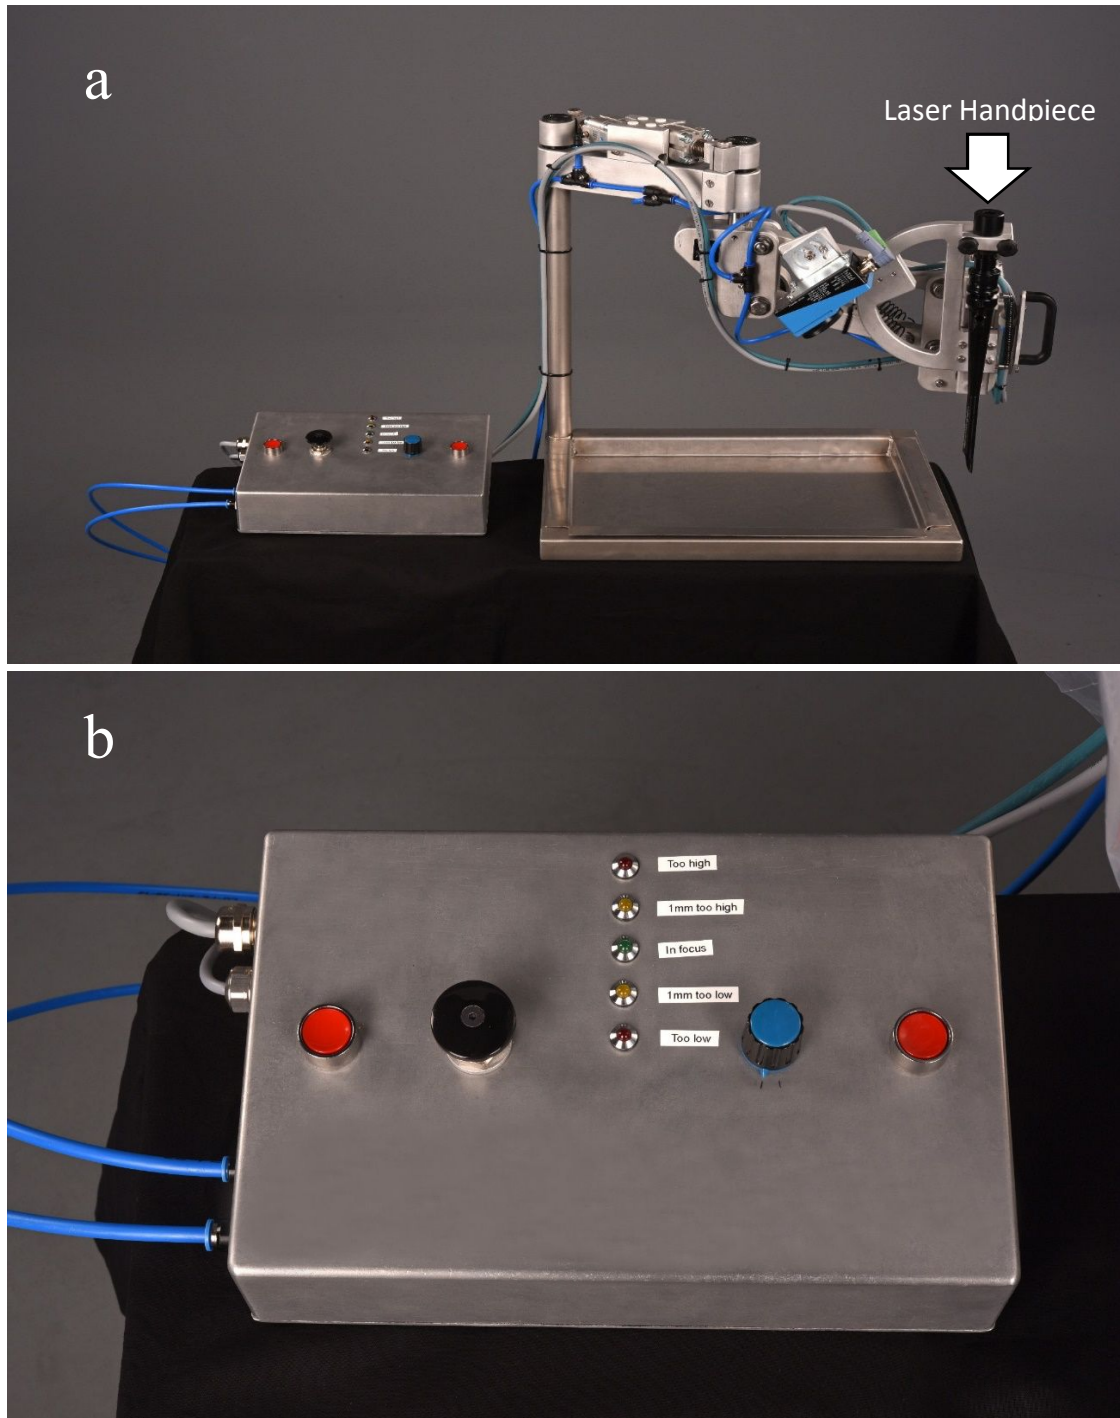

**Fig. S1** Home built laser arm used to maintain the laser in a fixed and safe position during analysis [a]. Control box for the safety arm includes height control to ensure that the laser is at optimal focus position on the tissue analyzed [b]

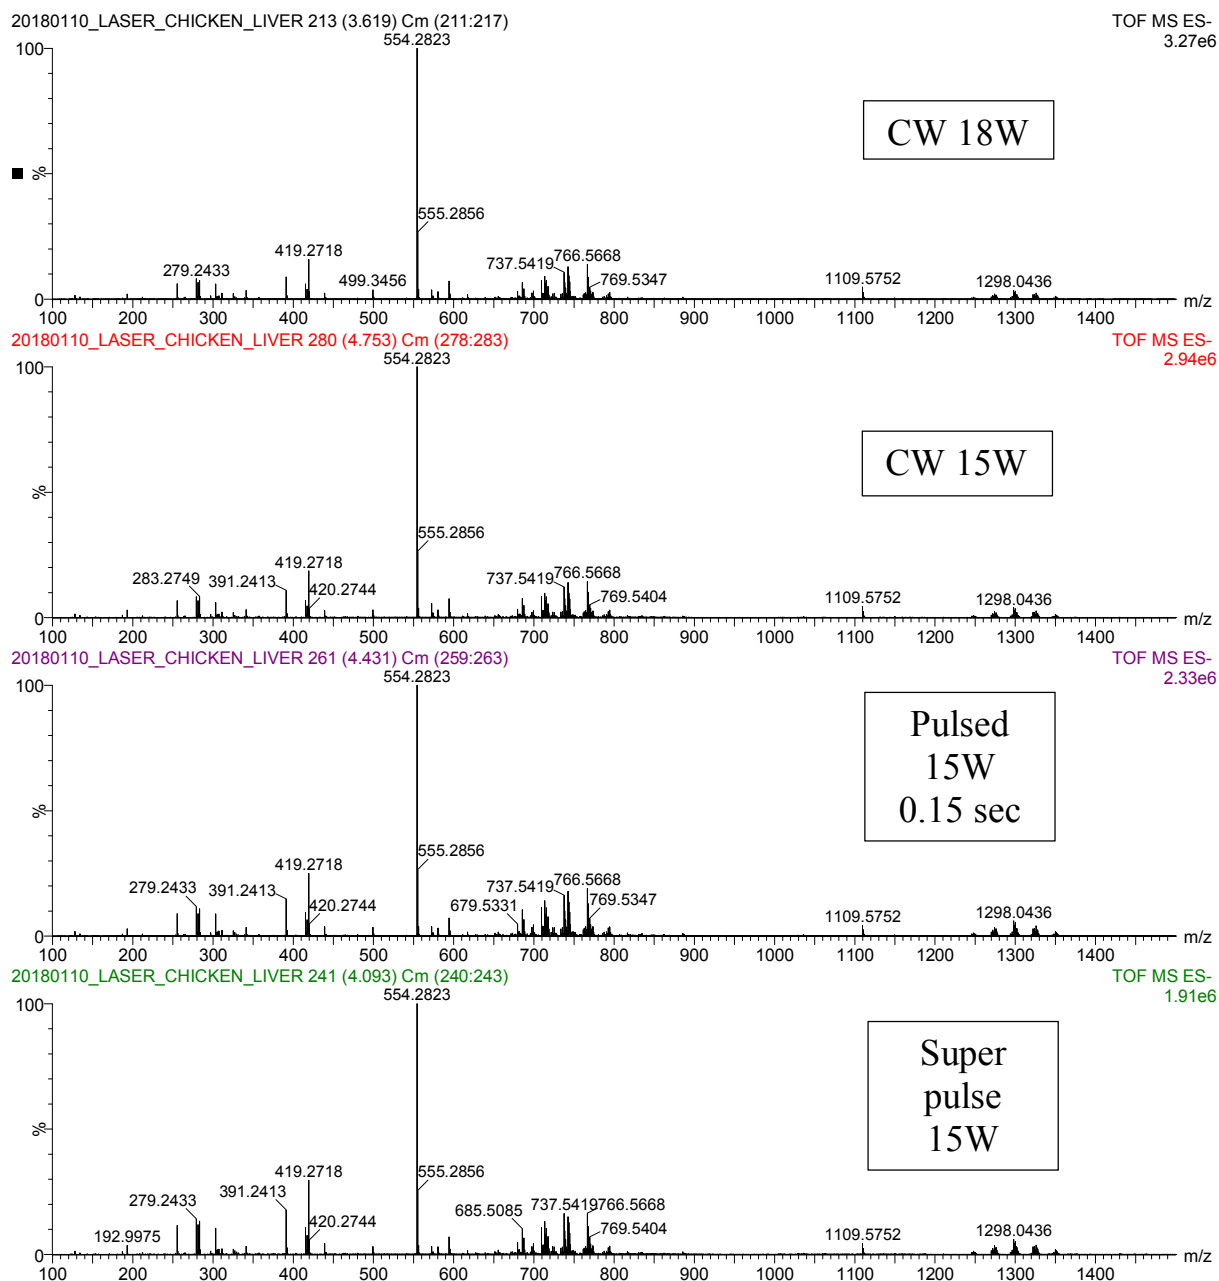

**Fig. S2** – Laser-REIMS spectra obtained from sampling chicken liver with different modalities. CW = continuous wave, Pulsed and super pulse modalities

Cow Liver\_Recal#78-483 RT: 0.82-4.57 AV: 105 NL: 5.13E4  
T: FTMS - p NSI Full ms [200.0000-2000.0000]

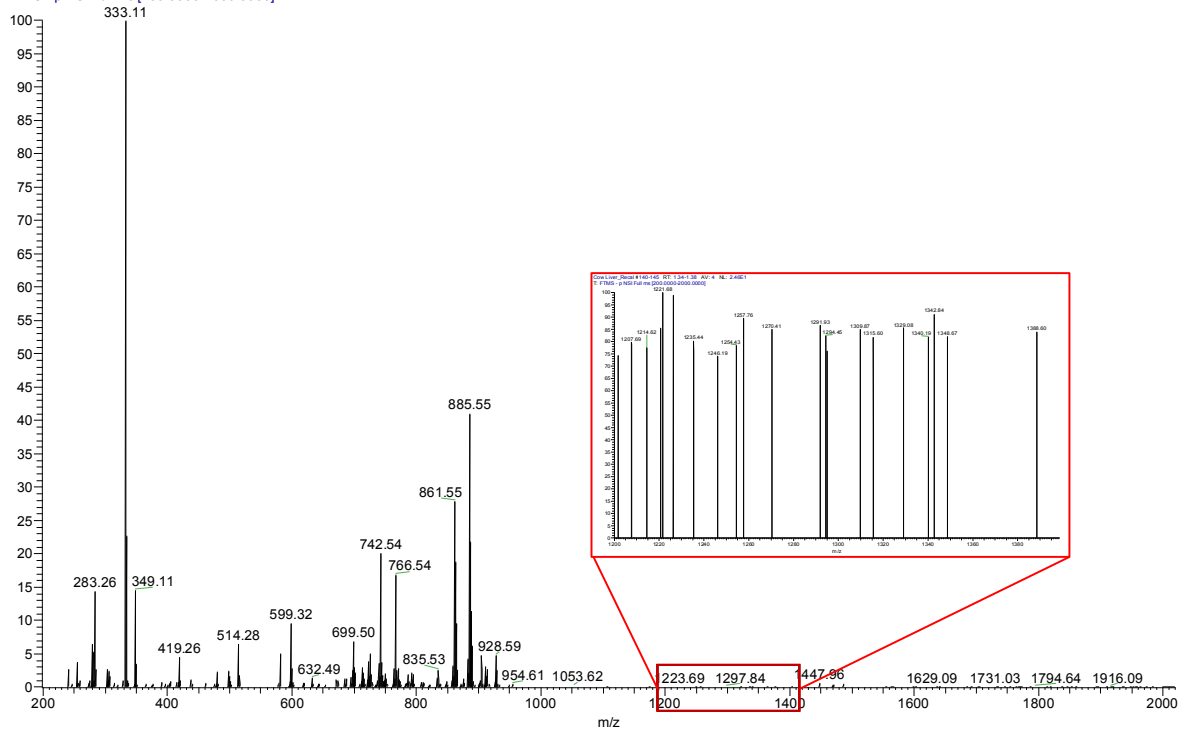

**Fig. S3** Mass spectra obtained from a cow liver sampled using the MALDI-Orbitrap and zoom in the region between m/z 1200-1400. No clusters are visible in the higher mass range

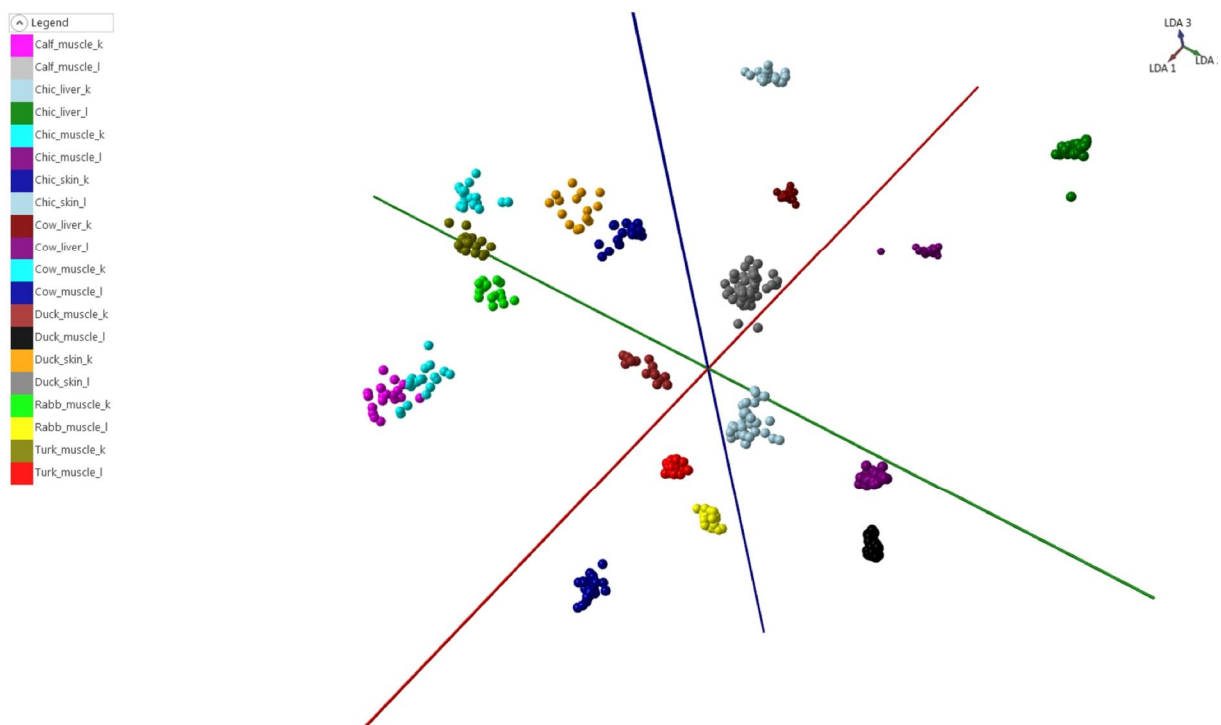

**Fig. S4** REIMS-LDA-3D score plot including all data acquired from sampling soft tissue types. L=laser. k=diathermic knife

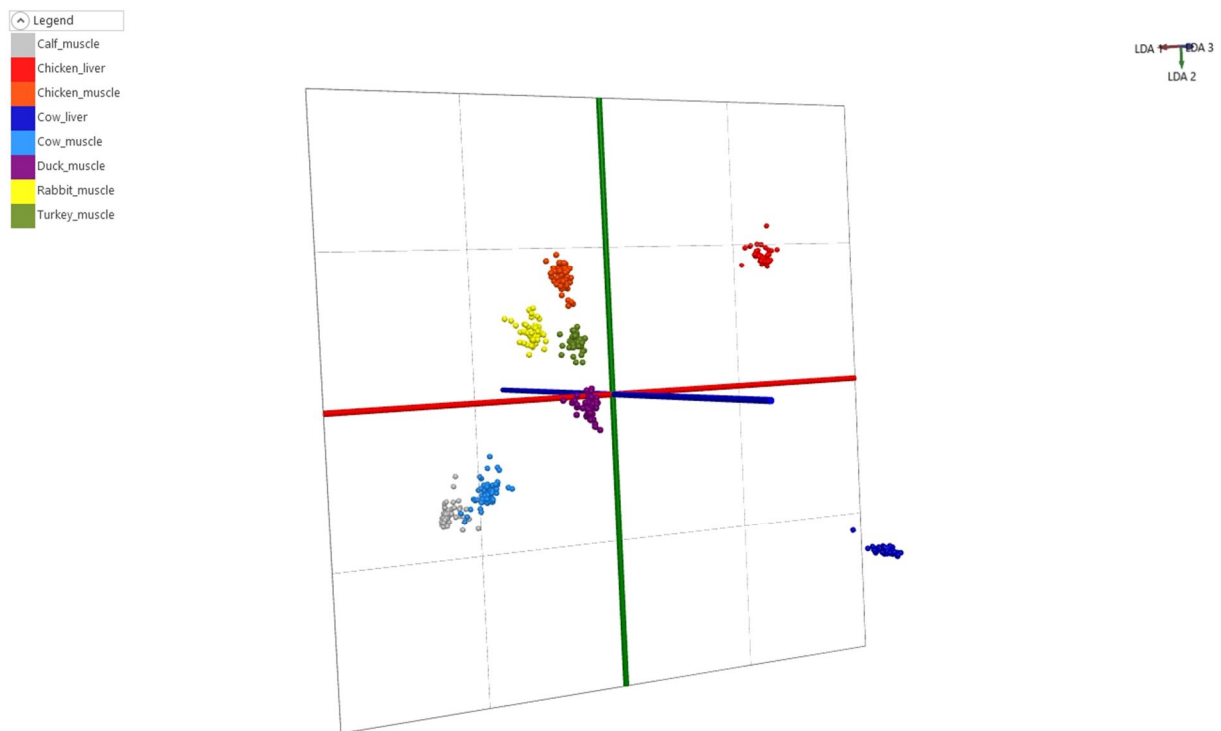

**Fig. S5** Laser REIMS-LDA-3D score plot including data acquired from sampling soft tissue types but excluding the data related to duck skin. Laser data only

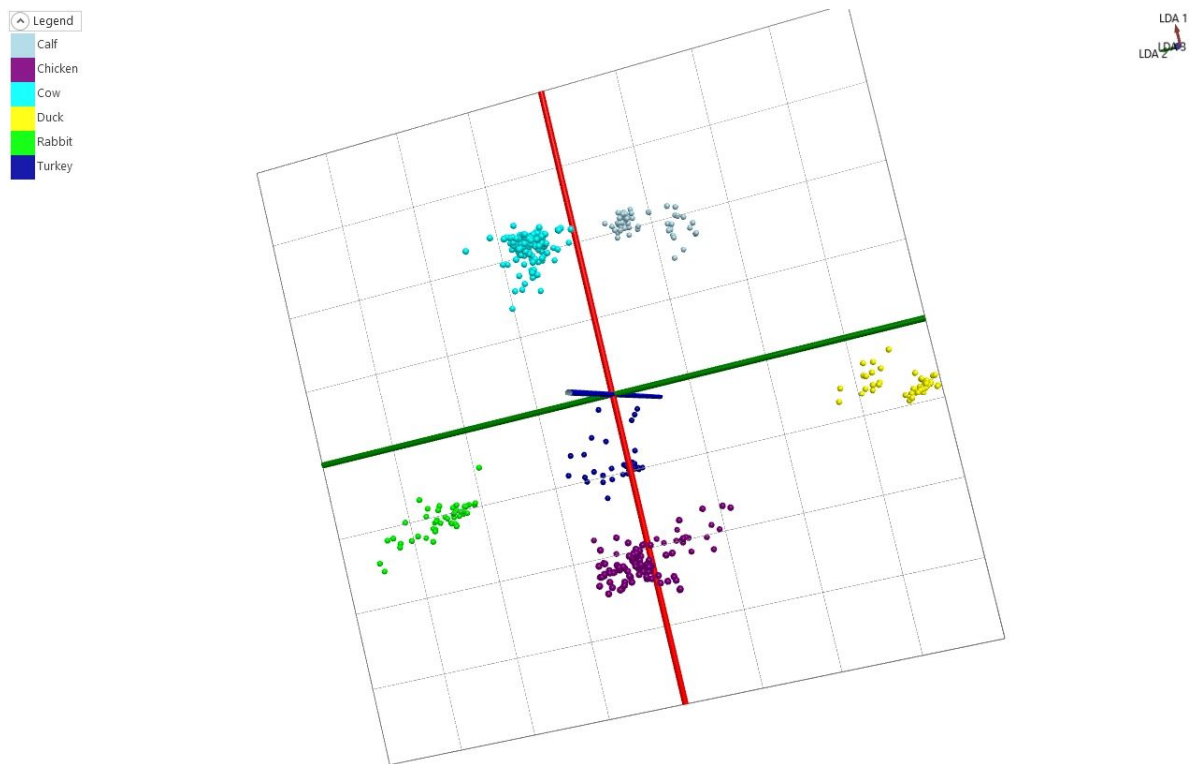

**Fig. S6** Laser REIMS-LDA-3D score plot including data acquired from sampling soft tissue types but excluding the data related to duck skin and duck liver. Diathermic data only

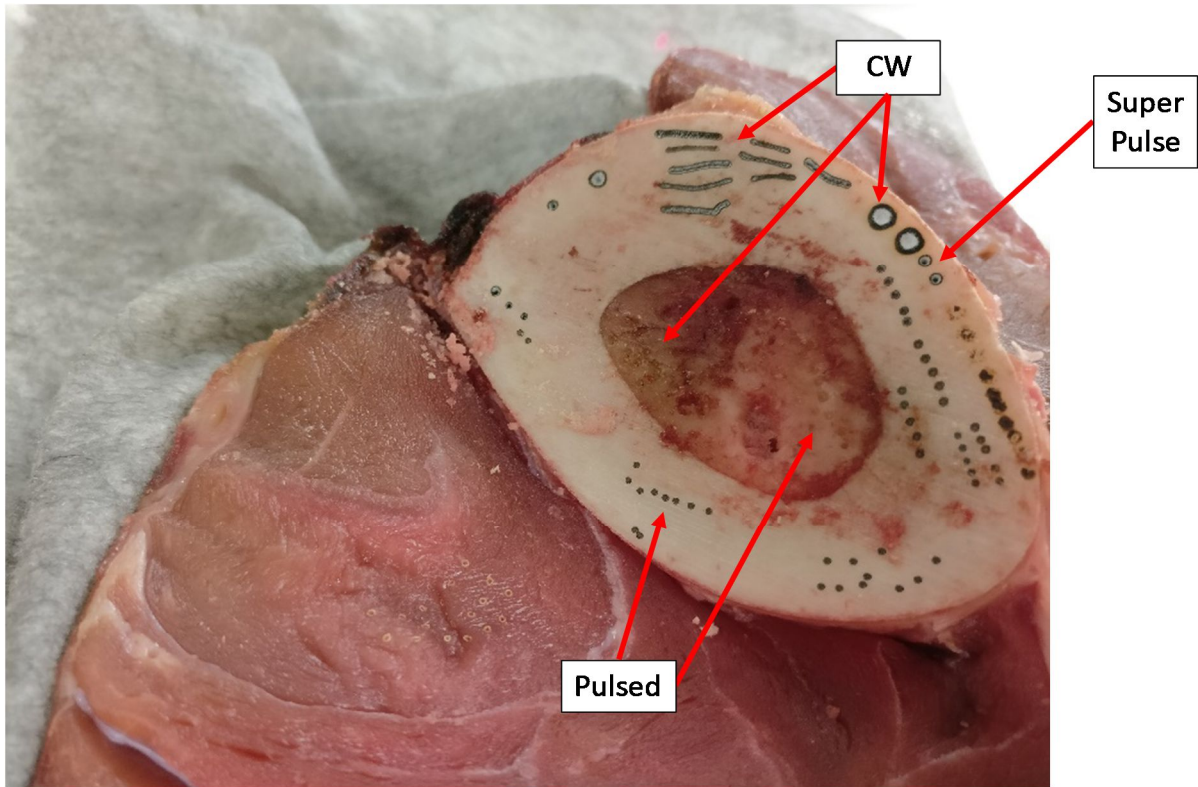

**Fig. S7** Visualization of bone damage induced by laser sampling using different modalities available with the CO<sub>2</sub> laser system. CW = continuous wave operated in laser dot modality



**Table S1** Lipid identification from REIMS and MALDI-MS measurements of cow liver tissues. CE= collision energy (eV), Measured REIMS = measured m/z with REIMS-TOF system, Orbitrap = measured m/z with Orbitrap system, Theor.Mass = Theoretical mass (m/z), ppm err = calculated error in part-per-million (for REIMS, Orbitrap), Prod ion = Product ion (m/z, for REIMS), Fragments id = fragments identification, Id = Lipid identification

| Cow Liver |                |          |             | ppm err | ppm err  | Prod ion | Prod ion  | ppm err  |                                    |                   |                     |
|-----------|----------------|----------|-------------|---------|----------|----------|-----------|----------|------------------------------------|-------------------|---------------------|
| CE Reims  | Measured REIMS | Orbitrap | Theor. Mass | REIMS   | Orbitrap | REIMS    | Theor.    | prod ion | fragments id                       | id                | adduct              |
| 28        | 713,51         | 713,5128 | 713,51286   | 4,003   | 0,078    | 451,28   | 451,28301 | 6,679    | FA 18:2(-H)                        |                   |                     |
|           |                |          |             |         |          | 283,26   | 283,26425 | 15,018   | FA 18:0(+O)                        | <u>Tag 38:2:1</u> | [M+Cl] <sup>-</sup> |
|           |                |          |             |         |          | 279,23   | 279,23290 | 10,386   | FA 18:2(+O)                        |                   |                     |
| 30        | 742,52         | 742,5392 | 742,53923   | 25,897  | 0,039    | 481,3    | 481,25719 | -88,940  | -FA 18:1(-H)                       | <u>PE 36:2</u>    | [M-H] <sup>-</sup>  |
|           |                |          |             |         |          | 283,26   | 283,26425 | 15,018   | FA 18:0(+O)                        |                   |                     |
|           |                |          |             |         |          | 279,23   | 279,23290 | 10,386   | FA 18:2(+O)                        |                   |                     |
|           |                |          |             |         |          | 255,23   | 255,23295 | 11,574   | FA 16:0(+O)                        |                   |                     |
| 30        | 745,53         | 745,5025 | 745,50251   | -36,874 | 0,012    | 481,3    | 481,25719 | -88,940  | -FA 18:1(-H)                       | <u>PG 34:2</u>    | [M-H] <sup>-</sup>  |
|           |                |          |             |         |          | 283,26   | 283,26425 | 15,018   | FA 18:0(+O)                        |                   |                     |
|           |                |          |             |         |          | 281,25   | 281,24860 | -4,964   | FA 18:1(+O)                        |                   |                     |
|           |                |          |             |         |          | 279,23   | 279,23290 | 10,386   | FA 18:2(+O)                        |                   |                     |
|           |                |          |             |         |          | 255,23   | 255,23295 | 11,574   | FA 16:0(+O)                        |                   |                     |
| 30        | 763,5          | 763,4552 | 763,45556   | -58,207 | 0,470    | 451,28   | 451,28301 | 6,679    | -FA 22:5(-H)                       | <u>PG 36:7</u>    | [M-H] <sup>-</sup>  |
|           |                |          |             |         |          | 329,25   | 329,24860 | -4,240   | FA 22:5(+O)                        |                   |                     |
|           |                |          |             |         |          | 283,26   | 283,24313 | -59,574  | FA 22:6(-CO)                       |                   |                     |
| 33        | 793,54         | 793,5019 | 793,50251   | -47,245 | 0,767    | 481,29   | 481,23606 | -112,065 | -FA 20:0(+HO) -FA 16:0(-H) -PG(74) | <u>PG 38:6</u>    | [M-H] <sup>-</sup>  |
|           |                |          |             |         |          | 303,23   | 303,23295 | 9,742    | FA 20:4(+O)                        |                   |                     |
|           |                |          |             |         |          | 283,26   | 283,26425 | 15,018   | FA 22:6(-CO) - FA 18:0(+O)         |                   |                     |
|           |                |          |             |         |          | 279,23   | 279,23290 | 10,386   | FA 18:2(+O)                        |                   |                     |
|           |                |          |             |         |          | 255,23   | 255,23295 | 11,574   | FA 16:0(+O) - FA 20:6(-CO)         |                   |                     |

**Table S2 Lipid identification from chicken liver measurements.** CE= collision energy (eV), Measured REIMS = measured m/z with REIMS-TOF system, Orbitrap = measured m/z with Orbitrap system, Theor.Mass = Theoretical mass (m/z), Ppm err = calculated error in part-per-million (for REIMS, Orbitrap), Prod ion = Product ion (m/z, for REIMS), Fragments id = fragments identification, Id = Lipid identification

| Chicken Liver |                |          |             | ppm err | ppm err  | Prod ion | Prod ion  | ppm err  |                                      |                |                    |
|---------------|----------------|----------|-------------|---------|----------|----------|-----------|----------|--------------------------------------|----------------|--------------------|
| CE Reims      | Measured REIMS | Orbitrap | Theor. Mass | REIMS   | Orbitrap | REIMS    | Theor.    | prod ion | fragments id                         | id             | adduct             |
| 28            | 697,46         | 697,4812 | 697,48138   | -30,653 | -0,25807 | 435,24   | 435,25171 | 26,914   | -FA 18:2(-H)                         |                |                    |
|               |                |          |             |         |          | 417,23   | 417,24115 | 26,724   | -FA 18:2(+HO)                        | <u>PA 36:3</u> | [M-H] <sup>-</sup> |
|               |                |          |             |         |          | 281,24   | 281,2486  | 30,593   | FA 18:1(+O)                          |                |                    |
|               |                |          |             |         |          | 279,22   | 279,2329  | 46,200   | -FA 28:3(+HO)                        |                |                    |
|               |                |          |             |         |          | 255,22   | 255,23295 | 50,756   | FA 16:0(+O)                          |                |                    |
| 30            | 742,51         | 742,5392 | 742,539229  | -39,364 | -0,03906 | 480,29   | 480,30956 | 40,732   | -FA 18:2(-H)                         | <u>PE 36:2</u> | [M-H] <sup>-</sup> |
|               |                |          |             |         |          | 462,28   | 462,26261 | -37,611  | -FA 19:0(-H)                         |                |                    |
|               |                |          |             |         |          | 283,25   | 283,26425 | 50,323   | FA 18:0(+O)                          |                |                    |
|               |                |          |             |         |          | 279,22   | 279,23295 | 46,394   | FA 18:2(+O)                          |                |                    |
|               |                |          |             |         |          | 255,22   | 255,23295 | 50,756   | FA 16:0(+O)                          |                |                    |
| 30            | 766,51         | 766,539  | 766,539229  | -38,131 | -0,29875 | 480,29   | 480,30956 | 40,732   | -FA 20:4(-H)                         |                |                    |
|               |                |          |             |         |          | 462,28   | 462,299   | 41,098   | FA 20: 4 ( -OH)                      | <u>PE 38:4</u> | [M-H] <sup>-</sup> |
|               |                |          |             |         |          | 303,22   | 303,23295 | 42,721   | FA 20:4(+O)                          |                |                    |
|               |                |          |             |         |          | 283,25   | 283,26425 | 50,323   | FA 18:0(+O)                          |                |                    |
|               |                |          |             |         |          | 255,22   | 255,23295 | 50,756   | FA 16:0(+O)                          |                |                    |
| 30            | 767,5          | 767,4865 | 767,486859  | 17,122  | -0,46776 | 577,23   | 577,42387 | 335,854  | -FA 12:5(+HO)                        | <u>PG 36:5</u> | [M-H] <sup>-</sup> |
|               |                |          |             |         |          | 555,25   | 555,34562 | 172,202  | -FA 9:1(-H) -PG(74)                  |                |                    |
|               |                |          |             |         |          | 481,28   | 481,25719 | -47,388  | -FA 20:4(-H)                         |                |                    |
|               |                |          |             |         |          | 303,22   | 303,23295 | 42,721   | FA 20:4(+O)                          |                |                    |
|               |                |          |             |         |          | 283,26   | 283,26425 | 15,018   | FA 18:0(+O)                          |                |                    |
|               |                |          |             |         |          | 255,22   | 255,23295 | 50,756   | FA 16:0(+O)                          |                |                    |
| 30            | 773,51         | 773,5336 | 773,533809  | -30,78  | -0,27019 | 491,26   | 491,27793 | 36,496   | -FA 1:18(+HO) / -FA 1:14(-H) -PG(74) | <u>PG 36:2</u> | [M-H] <sup>-</sup> |
|               |                |          |             |         |          | 417,23   | 417,24115 | 26,724   | -FA 18:1(+HO) -PG(74)                |                |                    |
|               |                |          |             |         |          | 307,25   | 307,26425 | 46,392   | FA 20:2(+O)                          |                |                    |

|  |  |  |  |  |  |        |           |        |                           |  |  |
|--|--|--|--|--|--|--------|-----------|--------|---------------------------|--|--|
|  |  |  |  |  |  | 279,22 | 279,23295 | 46,394 | FA 18:2(+O)               |  |  |
|  |  |  |  |  |  | 255,22 | 255,23295 | 50,756 | FA 14:1(+O) / FA 16:0(+O) |  |  |
|  |  |  |  |  |  | 152,99 | 152,99583 | 38,133 | PG(153)                   |  |  |
|  |  |  |  |  |  |        |           |        |                           |  |  |

**Table S3 Lipid identification from cow muscle measurements.** CE= collision energy (eV), Measured REIMS = measured m/z with REIMS-TOF system, Orbitrap = measured m/z with Orbitrap system, Theor.Mass = Theoretical mass (m/z), Ppm err = calculated error in part-per-million (for REIMS, Orbitrap), Prod ion = Product ion (m/z, for REIMS), Fragments id = fragments identification, Id = Lipid identification

| Cow Muscle |                |          |             | ppm err | ppm err  | Prod ion | Prod ion  | ppm err   |                       |                  |                    |
|------------|----------------|----------|-------------|---------|----------|----------|-----------|-----------|-----------------------|------------------|--------------------|
| CE Reims   | Measured REIMS | Orbitrap | Theor. Mass | REIMS   | Orbitrap | REIMS    | Theor.    | prod ion  | fragments id          | id               | adduct             |
| 28         | 681,45         | 681,3777 | 681,37731   | -106,7  | -0,574   | 419,25   | 419,25680 | 16,219    | -FA 12:6(+HO) -PG(74) | <u>PG 30:6</u>   | [M-H] <sup>+</sup> |
|            |                |          |             |         |          | 401,18   | 401,17347 | -16,289   | -FA 14:2(-H) -PG(74)  |                  |                    |
|            |                |          |             |         |          | 375,20   | 375,15782 | -112,433  | -FA 16:3(-H) -PG(74)  |                  |                    |
|            |                |          |             |         |          | 279,23   | 279,23295 | 10,579    | FA 18:2(+O)           |                  |                    |
|            |                |          |             |         |          | 253,21   | 253,21730 | 28,846    | FA 16:1(+O)           |                  |                    |
| 30         | 715,55         | 715,4559 | 715,45556   | -132,0  | -0,477   | 283,25   | 283,26425 | 50,323    | FA 18:0(+O)           | <u>PG 32:3</u>   | [M-H] <sup>+</sup> |
|            |                |          |             |         |          | 281,24   | 281,24860 | 30,593    | FA 18:1(+O)           |                  |                    |
|            |                |          |             |         |          | 279,22   | 279,23295 | 46,394    | FA 18:2(+O)           |                  |                    |
|            |                |          |             |         |          | 255,22   | 255,23295 | 50,756    | FA 16:0(+O)           |                  |                    |
| 30         | 717,48         | 717,4716 | 717,47121   | -12,253 | -0,545   | 453,25   | 453,22589 | -53,187   | -FA 18:1(-H)          |                  |                    |
|            |                |          |             |         |          | 281,24   | 281,24860 | 30,593    | FA 18:1(+O)           | <u>PG 32:2</u>   | [M-H] <sup>+</sup> |
|            |                |          |             |         |          | 255,22   | 255,23295 | 50,756    | FA 16:0(+O)           |                  |                    |
|            |                |          |             |         |          | 253,21   | 253,21730 | 28,846    | FA 16:1(+O)           |                  |                    |
| 30         | 750,51         | 750,5441 | 750,54546   | 47,244  | 1,808    | 464,30   | 464,31465 | 31,549    | -FA 20:4(-H)          |                  |                    |
|            |                |          |             |         |          | 436,27   | 436,28335 | 30,596    | -FA 22:4(-H)          | <u>PE O-38:5</u> | [M-H] <sup>+</sup> |
|            |                |          |             |         |          | 331,25   | 330,14758 | -3328,051 | -FA 28:2(+HO)         |                  |                    |
|            |                |          |             |         |          | 303,22   | 303,23295 | 42,721    | FA 20:4(+O)           |                  |                    |
|            |                |          |             |         |          | 283,26   | 283,26425 | 15,018    | FA 18:0(+O)           |                  |                    |
|            |                |          |             |         |          | 196,03   | 195,13905 | -4544,952 | FA 12:2(+O)           |                  |                    |

|    |        |          |           |        |        |        |           |         |                   |                            |                    |
|----|--------|----------|-----------|--------|--------|--------|-----------|---------|-------------------|----------------------------|--------------------|
| 33 | 863,54 | 863,5659 | 863,56550 | 29,533 | -0,460 | 581,29 | 581,30962 | 33,758  | -FA 18:1(+HO)     | <u>PI 36:1 (18:0/18:1)</u> | [M-H] <sup>-</sup> |
|    |        |          |           |        |        | 419,25 | 419,25680 | 16,219  | FA 18:0(+C3H5O5P) |                            |                    |
|    |        |          |           |        |        | 297,03 | 297,11086 | 272,242 | FA 8:0(+C3H7O6P)  |                            |                    |
|    |        |          |           |        |        | 283,25 | 283,26425 | 50,323  | FA 18:0(+O)       |                            |                    |
|    |        |          |           |        |        | 281,24 | 281,24860 | 30,593  | FA 18:1(+O)       |                            |                    |
|    |        |          |           |        |        | 259,01 | 259,02244 | 48,041  | PI(259)           |                            |                    |
|    |        |          |           |        |        | 241,00 | 241,01188 | 49,286  | PI(241)           |                            |                    |
|    |        |          |           |        |        | 223,00 | 223,00131 | 5,888   | PI(223)           |                            |                    |

**Table S4 Lipid identification from chicken muscle measurements.** CE= collision energy (eV), Measured REIMS = measured m/z with REIMS-TOF system, Orbitrap = measured m/z with Orbitrap system, Theor.Mass = Theoretical mass (m/z), Ppm err = calculated error in part-per-million (for REIMS, Orbitrap), Prod ion = Product ion (m/z, for REIMS), Fragments id = fragments identification, Id = Lipid identification

| CE Reims | Chicken Muscle |          |             | ppm err | ppm err  | Prod ion | Prod ion  | ppm err  | fragments id  | id                    | adduct             |
|----------|----------------|----------|-------------|---------|----------|----------|-----------|----------|---------------|-----------------------|--------------------|
|          | Measured REIMS | Orbitrap | Theor. Mass | REIMS   | Orbitrap | REIMS    | Theor.    | prod ion |               |                       |                    |
| 28       | 697,46         | 697,4812 | 697,48138   | -30,653 | -0,258   | 435,24   | 435,25171 | 26,914   | -FA 18:2(-H)  |                       |                    |
|          |                |          |             |         |          | 281,24   | 281,24860 | 30,593   | FA 18:1(+O)   | <u>PA 36:3</u>        | [M-H] <sup>-</sup> |
|          |                |          |             |         |          | 279,22   | 279,23295 | 46,394   | FA 18:2(+O)   |                       |                    |
|          |                |          |             |         |          | 255,22   | 255,23295 | 50,756   | FA 16:0(+O)   |                       |                    |
| 28       | 699,47         | 699,4967 | 699,49703   | -38,642 | -0,472   | 435,23   | 435,25171 | 49,891   | -FA 18:1(-H)  |                       |                    |
|          |                |          |             |         |          | 419,24   | 419,25680 | 40,073   | -FA 18:2(+HO) | <u>PA 36:2</u>        | [M-H] <sup>-</sup> |
|          |                |          |             |         |          | 281,24   | 281,24860 | 30,593   | FA 18:1(+O)   |                       |                    |
|          |                |          |             |         |          | 255,22   | 255,23295 | 50,756   | FA 16:0(+O)   |                       |                    |
| 30       | 766,51         | 766,539  | 766,53923   | -38,131 | -0,299   | 480,29   | 480,30956 | 40,732   | -FA 20:4(-H)  |                       |                    |
|          |                |          |             |         |          | 303,22   | 303,23295 | 42,721   | FA 20:4(+O)   | <u>PE (18:0/20:4)</u> | [M-H] <sup>-</sup> |
|          |                |          |             |         |          | 283,25   | 283,26425 | 50,323   | FA 18:0(+O)   |                       |                    |
|          |                |          |             |         |          | 255,22   | 255,23295 | 50,756   | FA 16:0(+O)   |                       |                    |
| 33       | 885,53         | 885,5498 | 885,54985   | -22,419 | -0,060   | 599,31   | 599,32019 | 16,998   | -FA 20:4(-H)  | <u>PI(20:4/18:0)</u>  | [M-H] <sup>-</sup> |

|  |  |  |  |  |  |        |           |        |                   |  |  |
|--|--|--|--|--|--|--------|-----------|--------|-------------------|--|--|
|  |  |  |  |  |  | 581,29 | 581,30962 | 33,758 | -FA 20:4(+HO)     |  |  |
|  |  |  |  |  |  | 419,24 | 419,25680 | 40,073 | FA 18:0(+C3H5O5P) |  |  |
|  |  |  |  |  |  | 303,22 | 303,23295 | 42,721 | FA 20:4(+O)       |  |  |
|  |  |  |  |  |  | 283,26 | 283,26425 | 15,018 | FA 18:0(+O)       |  |  |
|  |  |  |  |  |  | 259,01 | 259,02244 | 48,041 | PI(259)           |  |  |
|  |  |  |  |  |  | 241,00 | 241,01188 | 49,286 | PI(241)           |  |  |
|  |  |  |  |  |  | 223,00 | 223,00131 | 5,888  | PI(223)           |  |  |
|  |  |  |  |  |  |        |           |        |                   |  |  |

**Table S5** Results from the spectra comparison between the laser and diathermic knife

|            | TIC        | Noise level | S/N         | n peaks detectable | Avg. intensity n=10 peaks |
|------------|------------|-------------|-------------|--------------------|---------------------------|
|            | (n=10), CV | n=10        | s/n, (n=10) |                    | n=5 consecutive burns, CV |
| Laser      | 11,31%     | -           | + 1,7x      | + 7%*              | 0,76%                     |
| Diathermic | 15,25%     | 1,6x        | -           |                    | 1,94%                     |

\*more peaks detectable due to lipid clusters

**Table S6** Peak lists reporting m/z values used to create the different peak list-based models. The m/z values are reported in order of importance for the discrimination of each tissue with the most important values on top. For the “All” model, a combination of peak lists was used accordingly to the tissues included in the model

| Muscle |        |         |        |        |        | Liver  |         |
|--------|--------|---------|--------|--------|--------|--------|---------|
| cow    | calf   | chicken | duck   | turkey | rabbit | cow    | chicken |
| 717,50 | 742,50 | 676,50  | 636,50 | 881,50 | 874,50 | 897,50 | 620,50  |
| 622,50 | 697,50 | 855,50  | 878,50 | 699,50 | 824,50 | 754,50 | 646,50  |
| 611,50 | 743,50 | 700,50  | 739,50 | 748,50 | 885,50 | 607,50 | 621,50  |
| 792,50 | 726,50 | 701,50  | 621,50 | 747,50 | 718,50 | 713,50 | 766,50  |
| 721,50 | 698,50 | 744,50  | 769,50 | 666,50 | 886,50 | 793,50 | 773,50  |
| 705,50 | 715,50 | 728,50  | 709,50 | 743,50 | 691,50 | 743,50 | 697,50  |
| 764,50 | 699,50 | 703,50  | 697,50 | 725,50 | 744,50 | 715,50 | 742,50  |
| 718,50 | 725,50 | 730,50  | 770,50 | 723,50 | 769,50 | 741,50 | 767,50  |
| 612,50 | 727,50 | 702,50  | 699,50 | 612,50 | 794,50 | 711,50 | 738,50  |
| 776,50 | 770,50 | 750,50  | 747,50 | 697,50 | 750,50 | 745,50 | 709,50  |
| 719,50 | 681,50 | 671,50  | 775,50 | 714,50 | 752,50 | 763,50 | 721,50  |
| 765,50 | 752,50 | 729,50  | 771,50 | 722,50 | 887,50 | 765,50 | 774,50  |
| 720,50 | 768,50 | 745,50  | 695,50 | 726,50 | 715,50 | 863,50 | 762,50  |
| 793,50 | 741,50 | 886,50  | 723,50 | 701,50 | 778,50 | 735,50 | 699,50  |
| 790,50 | 724,50 | 719,50  | 725,50 | 683,50 | 751,50 | 861,50 | 698,50  |
| 749,50 | 744,50 | 691,50  | 751,50 | 749,50 | 745,50 | 701,50 | 611,50  |
| 818,50 | 751,50 | 704,50  | 710,50 | 724,50 | 719,50 | 820,50 | 733,50  |
| 623,50 | 716,50 | 683,50  | 713,50 | 770,50 | 670,50 | 714,50 | 679,50  |
| 693,50 | 700,50 | 715,50  | 766,50 | 741,50 | 730,50 | 712,50 | 612,50  |
| 737,50 | 685,50 | 731,50  | 711,50 | 773,50 | 795,50 | 775,50 | 722,50  |
| 701,50 | 753,50 | 672,50  | 743,50 | 775,50 | 673,50 | 887,50 | 725,50  |
| 644,50 | 771,50 | 722,50  | 792,50 | 772,50 | 780,50 | 746,50 | 790,50  |
| 767,50 | 754,50 | 716,50  | 834,50 | 768,50 | 779,50 | 796,50 | 771,50  |
| 735,50 | 769,50 | 726,50  | 772,50 | 727,50 | 753,50 | 772,50 | 710,50  |
| 731,50 | 740,50 | 657,50  | 748,50 | 681,50 | 700,50 | 770,50 | 642,50  |
| 791,50 | 683,50 | 687,50  | 767,50 | 713,50 | 703,50 | 821,50 | 685,50  |
| 777,50 | 709,50 | 629,50  | 698,50 | 740,50 | 674,50 | 883,50 | 695,50  |
| 816,50 | 671,50 | 642,50  | 749,50 | 774,50 | 861,50 | 792,50 | 750,50  |
| 650,50 | 887,50 | 780,50  | 724,50 | 667,50 | 766,50 | 736,50 | 749,50  |
| 600,50 | 682,50 | 741,50  | 696,50 | 623,50 | 792,50 | 716,50 | 834,50  |
| 834,50 | 861,50 | 684,50  | 737,50 | 738,50 | 692,50 | 727,50 | 687,50  |
| 706,50 | 747,50 | 778,50  | 794,50 | 657,50 | 739,50 | 888,50 | 726,50  |
| 819,50 | 723,50 | 661,50  | 863,50 | 787,50 | 888,50 | 795,50 | 787,50  |
| 883,50 | 728,50 | 893,50  | 833,50 | 789,50 | 704,50 | 776,50 | 673,50  |
| 613,50 | 686,50 | 746,50  | 835,50 | 655,50 | 868,50 | 864,50 | 622,50  |
| 758,50 | 862,50 | 891,50  | 707,50 | 815,50 | 781,50 | 889,50 | 737,50  |
| 820,50 | 755,50 | 679,50  | 832,50 | 810,50 | 734,50 | 862,50 | 835,50  |
| 763,50 | 672,50 | 779,50  | 831,50 | 639,50 | 675,50 | 729,50 | 682,50  |
| 654,50 | 889,50 | 756,50  | 789,50 | 684,50 | 831,50 | 816,50 | 700,50  |
| 614,50 | 669,50 | 867,50  | 864,50 | 664,50 | 601,50 | 777,50 | 739,50  |
| 804,50 | 822,50 | 754,50  | 787,50 | 679,50 | 702,50 | 702,50 | 785,50  |
| 602,50 | 756,50 | 689,50  | 714,50 | 696,50 | 659,50 | 822,50 | 788,50  |
| 648,50 | 823,50 | 659,50  | 838,50 | 640,50 | 844,50 | 859,50 | 885,50  |
| 817,50 | 814,50 | 692,50  | 841,50 | 651,50 | 618,50 | 791,50 | 680,50  |
| 680,50 | 825,50 | 670,50  | 773,50 | 838,50 | 797,50 | 748,50 | 686,50  |
| 607,50 | 798,50 | 630,50  | 795,50 | 634,50 | 647,50 | 808,50 | 734,50  |
| 609,50 | 712,50 | 658,50  | 850,50 | 638,50 | 867,50 | 818,50 | 833,50  |
| 665,50 | 826,50 | 631,50  | 733,50 | 656,50 | 661,50 | 817,50 | 666,50  |
